# Supplementary material for: Passivation performance and mechanism of a novel self-healing composite passivator on pyrite
Source: Royal Society of Chemistry journal article supplement (doi:10.1039/d4en00404c), 2024-01-01
Supplement: d4en00404c1.pdf [file d4en00404c1.pdf]

1

## **Supplementary Information**

2 **Passivation Performance and Mechanism of a Novel Self-Healing Composite**

3 **Passivator on Pyrite**

4 Weifeng Wu, Mengke Li, Jiang Tian, Feng Li, Yun Liu\*

5

6 Department of Environmental Science Engineering, College of Environment and

7 Resources, Xiangtan University, Xiangtan 411105, China

8

9 \*Corresponding author.

10 Fax: +86 731 58292231

11 Tel: +86 731 58292231

12 E-mail: liuyunscut@163.com (Yun Liu)

13

14 Present address: Department of Environmental Science and Engineering, College of

15 Environment and Resources, Xiangtan University, Xiangtan 411105, China

16

## 17 **Text S1 Electrochemical measurements methods**

18 A three-electrode system was used in the electrochemical measurements: a  
19 passivated pyrite electrode, a Pt foil sheet electrode (10 mm × 10 mm), and a saturated  
20 calomel electrode (SCE) with a Lugin capillary were used as the working electrode,  
21 counter electrode and reference electrode, respectively. A 0.2 M Na<sub>2</sub>SO<sub>4</sub> solution with  
22 pH 2.0 was served as the electrolyte. The electrochemical measurements were  
23 performed on a CHI650 electrochemical workshop. To make sure the electrochemical  
24 system was stable, an open circuit potential (OCP) test was performed before every  
25 electrochemical experiment. ZSimpwin software was used to match the acquired EIS  
26 data, which were carried out at OCPs in the frequency scope from 100 kHz to 0.01 Hz  
27 with a signal amplitude of 0.005 V. The Tafel tests were performed in the OCP ± 0.2  
28 V/SCE range at a scan rate of 1 mV/s.

## 29 **Text S2 Characterization**

30 A Tecnai G2 F20 field emission transmission electron microscope (TEM) was  
31 used to examine the microstructures of the pyrite specimens. The morphological  
32 characteristics of the pyrite surface were analyzed using a scanning electron microscope  
33 (SEM, TESCAN MIRA4). The static contact angle tests were carried out using a static  
34 contact angle meter (DSA30, Germany). A Revetest scratch tester (CSM-MCT,  
35 Switzerland) was utilized to conduct the scratch tests. A Fourier transform infrared  
36 (FTIR) spectrometer (Thermo Fisher Model Nicolet iS5) was used to identify the  
37 differences in chemical structure between the passivated and raw pyrite. X-ray  
38 photoelectron spectroscopy (XPS) was carried out using a Thermo Scientific  
39 ESCALAB 250Xi spectrometer with Al K $\alpha$  radiation. The C1s peak with a binding

40 energy of 284.80 eV was utilized to calibrate the acquired data.

#### 41 **Text S3 8-HQ release experiment**

42 The release characteristics of HH@PE-2, HH@PE-4, and HH@PE-6 in leach  
43 solutions at pH 1, 3, 5 and 6.5 are illustrated in Fig. S1, respectively. The results  
44 demonstrate that all the three different HH@PE samples can achieve pH response  
45 release of 8-HQ. However, as can be seen from Fig. S1a, when only two polyelectrolyte  
46 layers are wrapped, the release concentration of 8-HQ is still high even at pH=6.5,  
47 reaching 4.61 mg/L at 3 h. Whereas when six polyelectrolyte layers were wrapped (as  
48 seen in Fig. S1c), the release concentration of 8-HQ is very low under the pH=1, which  
49 is only 7.55 mg/L at 3 h. This suggests that too few polyelectrolyte layers are  
50 detrimental to the loading of 8-HQ under neutral environments, while too many  
51 polyelectrolyte layers are detrimental to the release of 8-HQ under acidic environments.  
52 For HH@PE-4 (Fig. S1b), it can be seen that the greatest release concentration of 8-  
53 HQ reaches 11.88 mg/L in the solution with pH=1 after 3h, while the corresponding  
54 data decrease sequentially to 9.67 mg/L, 4.60 mg/L and 3.00 mg/L in the solution with  
55 pH=3, 5 and 6.5, respectively. Consequently, it can be found that the HH@PE-4 can  
56 realize the best pH responsive release property of 8-HQ. Therefore, HH@PE-4 was  
57 selected as the nanofiller in the preparation of the composite passivator.

58

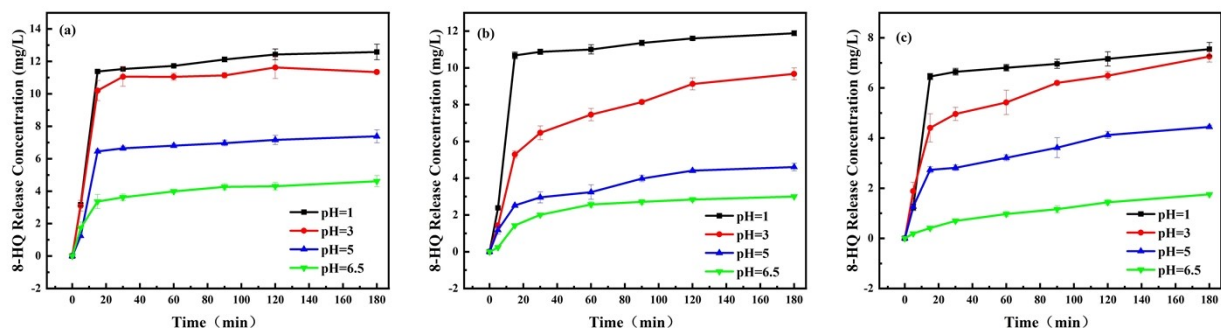

59

60 **Fig. S1.** Release concentration of 8-HQ in different pH solutions with (a) 2

61 polyelectrolyte layers, (b) 4 polyelectrolyte layers and (c) 6 polyelectrolyte layers.

62

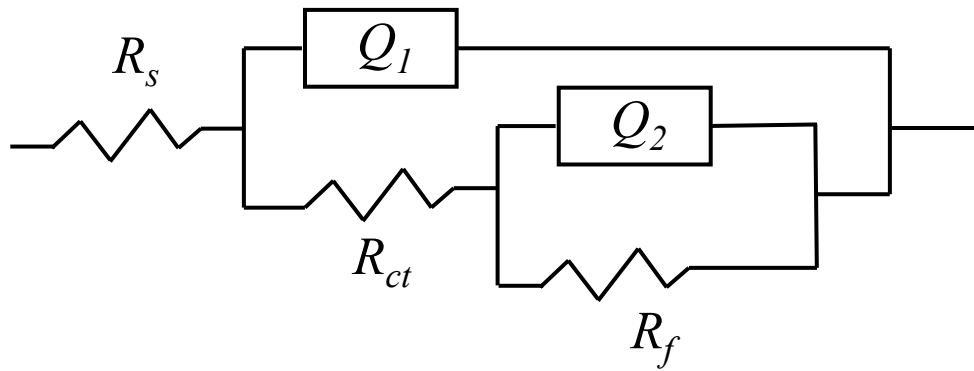

63

64 **Fig. S2.** Equivalent electrical circuit model for fitting the EIS data obtained from  
65 different pyrite electrodes.

66

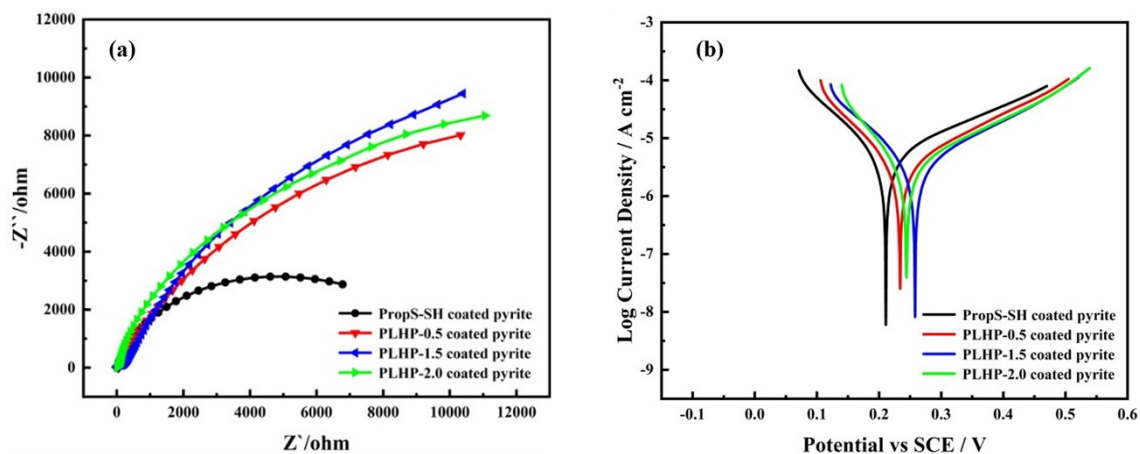

67

68 **Fig. S3.** (a) Nyquist plots of EIS data obtained from PropS-SH, PLHP-0.5, PLHP-1.0,

69 PLHP-1.5 coated pyrite electrodes in 0.2 M Na<sub>2</sub>SO<sub>4</sub> solution with pH 2.0; (b) Tafel

70 polarization curves of PropS-SH, PLHP-0.5, PLHP-1.0, PLHP-1.5 coated pyrite

71 electrodes in 0.2 M Na<sub>2</sub>SO<sub>4</sub> solution with pH 2.0.

72

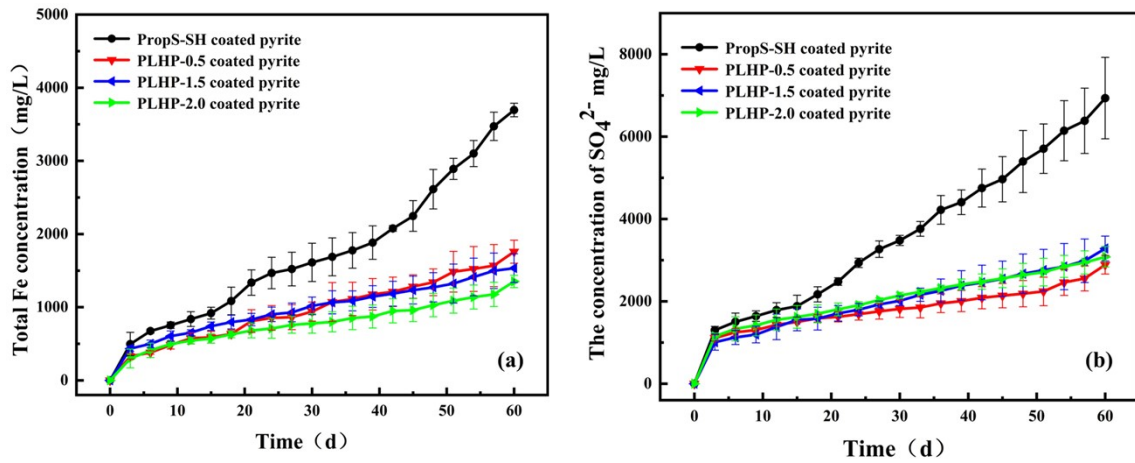

73

74 **Fig. S4.** Concentrations of (a) Total Fe and (b)  $\text{SO}_4^{2-}$  released as a function of time for

75 PropS-SH, PLHP-0.5, PLHP-1.0, PLHP-1.5 coated pyrite samples in the chemical

76 leaching solutions.

77

78 **Table S1.** Results of scratch adhesion tests for different coatings

| <b>Sample</b>                 | <b>Critical load(N)</b> |
|-------------------------------|-------------------------|
|                               | <b>Lc</b>               |
| <b>Raw pyrite</b>             | <b>1.98</b>             |
| <b>PL coated pyrite</b>       | <b>3.71</b>             |
| <b>PLHP-1.0 coated pyrite</b> | <b>6.68</b>             |
